# Supplementary material for: HPF1-dependent PARP activation promotes LIG3-XRCC1-mediated backup pathway of Okazaki fragment ligation
Source: PubMed Central journal article supplement (PMC8136790; doi:10.1093/nar/gkab269), 2021-04-19
Supplement: gkab269_supplemental_file.pdf [file gkab269_supplemental_file.pdf]

## SUPPLEMENTARY DATA

### **HPF1-dependent PARP activation promotes LIG3-XRCC1-mediated backup pathway of Okazaki fragment ligation**

Soichiro Kumamoto<sup>1</sup>, Atsuya Nishiyama<sup>1\*</sup>, Yoshie Chiba<sup>1</sup>, Ryota Miyashita<sup>1</sup>, Chieko Konishi<sup>1</sup>, Yoshiaki Azuma<sup>2</sup>, and Makoto Nakanishi<sup>1\*</sup>

<sup>1</sup> Division of Cancer Cell Biology, The Institute of Medical Science, The University of Tokyo, 4-6-1 Shirokanedai, Minato-ku, Tokyo 108-8639, Japan

<sup>2</sup> Department of Molecular Biosciences, University of Kansas, Lawrence, Kansas, 66045, U.S.A.

\* To whom correspondence should be addressed. Tel: 81-3-5449-5341; Fax: 81-3-5449-5342; Email: mkt-naka@g.ecc.u-tokyo.ac.jp

Correspondence may also be addressed to Atsuya Nishiyama. Tel: 81-3-5449-5731; Fax: 81-3-5449-5342; Email: uanishiyama@g.ecc.u-tokyo.ac.jp

**Figure S1**

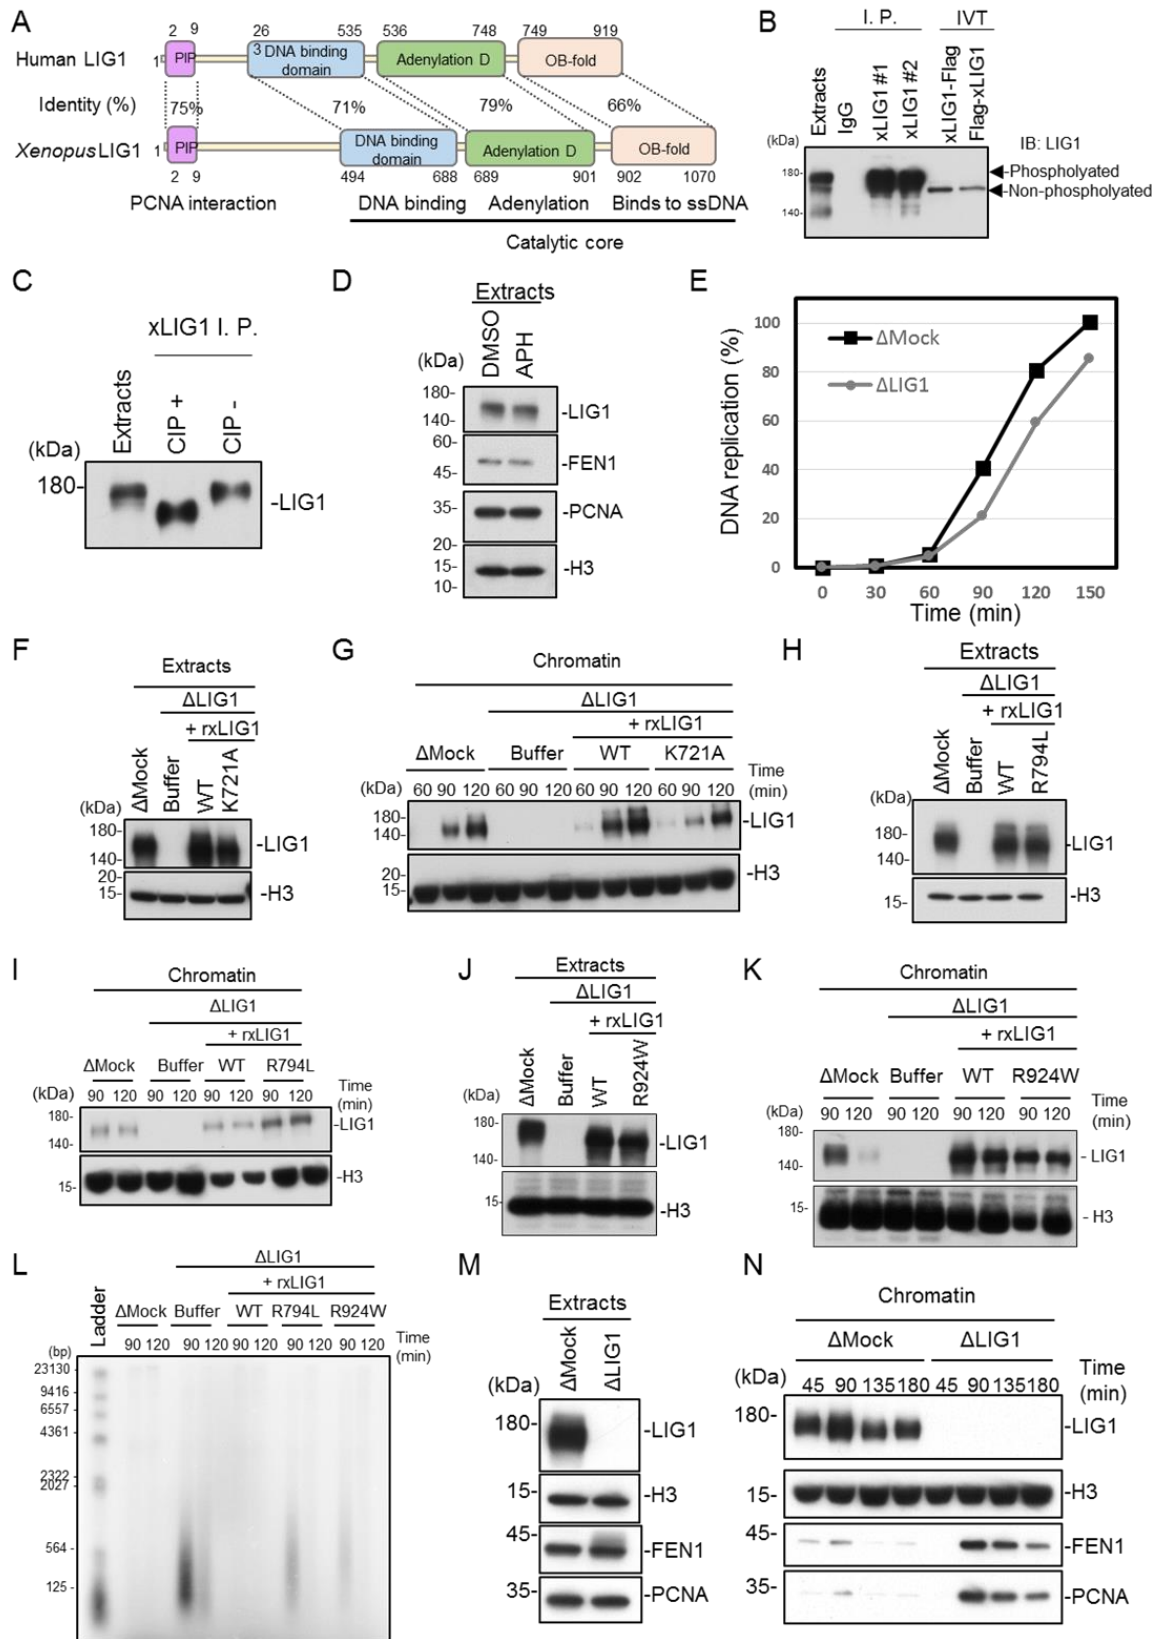

Supplementary Figure 1. (A) Domain structures of *Xenopus* and Human LIG1. LIG1 is composed of a PCNA-interacting protein (PIP) motif, a DNA binding domain, an adenylation domain and an oligonucleotide/oligosaccharide-binding (OB)-fold domain that are well conserved in humans and *Xenopus*. (B) Immunoblot analysis of egg extracts, LIG1 immunoprecipitates and reticulocyte lysates translating recombinant FLAG-tagged xLIG1 (n = 2). (C) xLIG1 protein was immunoprecipitated with the anti-xLIG1 antibody and incubated with (+) or without (–) alkaline phosphatase. (D) The extracts used in the chromatin binding experiment shown in Figure 1D were analyzed by immunoblot using the indicated antibodies. (E) DNA replication in xLIG1- and mock-depleted extracts. The relative amounts of DNA synthesis are shown (n = 2). (F) LIG1-depleted extracts were supplemented with wild-type xLIG1 or xLIG1-K721A and analyzed by immunoblotting using the indicated antibodies. (G) The extracts from (F) were used to replicate sperm nuclei. Chromatin-bound proteins were analyzed by immunoblotting (n = 3). (H) LIG1-depleted extracts were supplemented with wild-type xLIG1 or xLIG1-R794L and analyzed by immunoblotting using the indicated antibodies. (I) The extracts from (H) were used to replicate sperm nuclei. Chromatin-bound proteins were analyzed by immunoblotting (n = 2). (J) LIG1-depleted extracts were supplemented with wild-type xLIG1-3xFlag or xLIG1-K924W-3xFlag and analyzed by immunoblotting using the indicated antibodies. (K) The extracts from (J) were used to replicate sperm nuclei. Chromatin-bound proteins were analyzed by immunoblotting (n = 2). (L) xLIG1-depleted extracts were supplemented with wild-type xLIG1-3xFlag, xLIG1-R794L-3xFlag or xLIG1-R924W-3xFlag. Purified genomic DNA from chromatin was labeled using exonuclease-deficient Klenow fragment and  $\alpha$ -<sup>32</sup>P dCTP and separated in a denaturing agarose gel (n = 2). (M) Mock- and xLIG1-depleted extracts were analyzed by immunoblotting using the indicated antibodies. (N) The extracts from (M) were used to replicate sperm nuclei. Chromatin-bound proteins were analyzed by immunoblotting (n = 3).

**Figure S2**

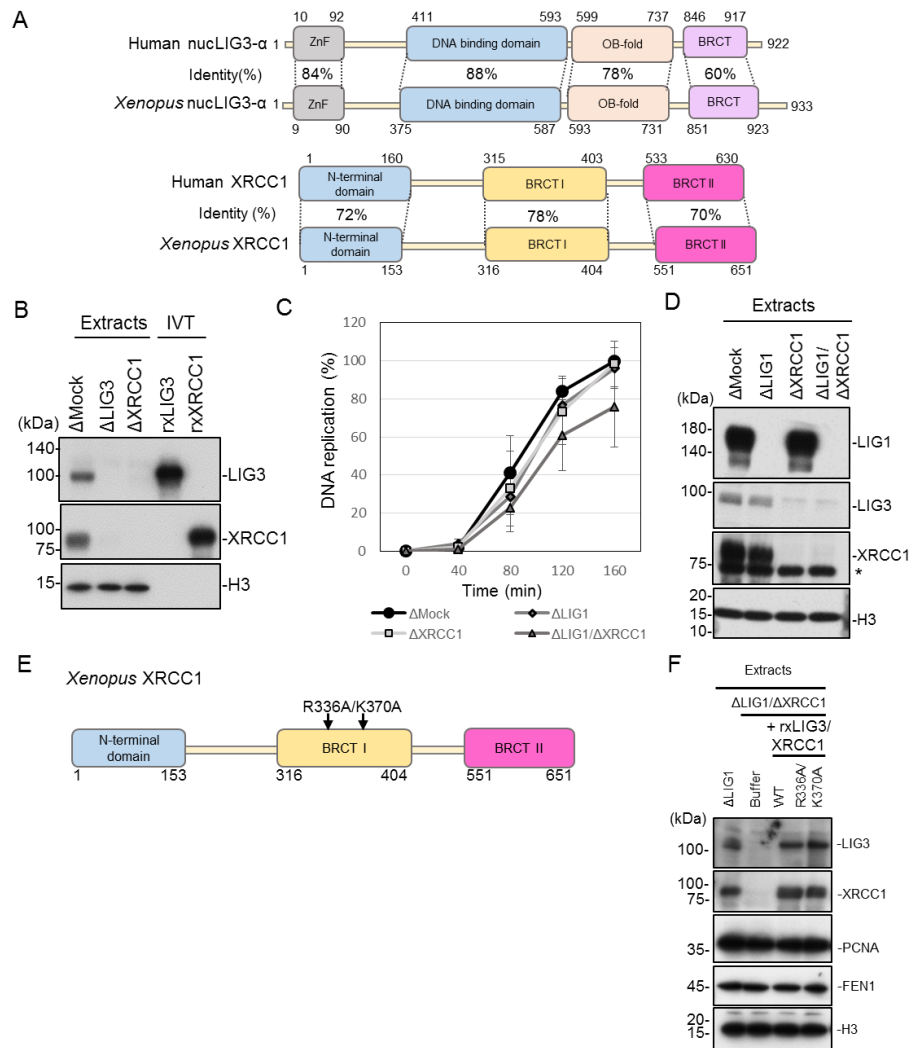

Supplementary Figure 2. (A) Domain structures of *Xenopus* and Human nuclear LIG3 and XRCC1. Nuclear LIG3 is composed of a zinc-finger (ZnF), DNA binding, oligonucleotide/oligosaccharide-binding (OB)-fold and BRCA1 C-Terminal (BRCT) domains that are well conserved in humans and *Xenopus*. XRCC1 is composed of an N-terminal domain, and BRCT I and BRCT II domains that are well conserved in humans and *Xenopus*. (B) Immunodepletion efficiency of xLIG3 and xXRCC1 from *Xenopus* egg extract. IVT; in vitro translation protein. Depleted extracts and IVT proteins were analyzed by immunoblotting using the indicated antibodies (n = 2). (C) DNA replication in xLIG1-, xXRCC1-, xLIG1/xXRCC1, and Mock-depleted extracts. The relative amounts of DNA synthesis are shown. Data shown are the average and S. D. (bars) three independent experiments. \*: Significantly different by Student's t-test at P < 0.01. (D) The extracts used in the chromatin binding experiment shown in Figure 2C were analyzed by immunoblot using the indicated antibodies. The asterisk indicates a non-specific band. (E) Sequences of the wild-type and R336A/K370A mutant BRCT I domain in xXRCC1 are shown. (F) The extracts used in the chromatin binding experiment shown in Figure 2D were analyzed by immunoblot using the indicated antibodies.

**Figure S3**

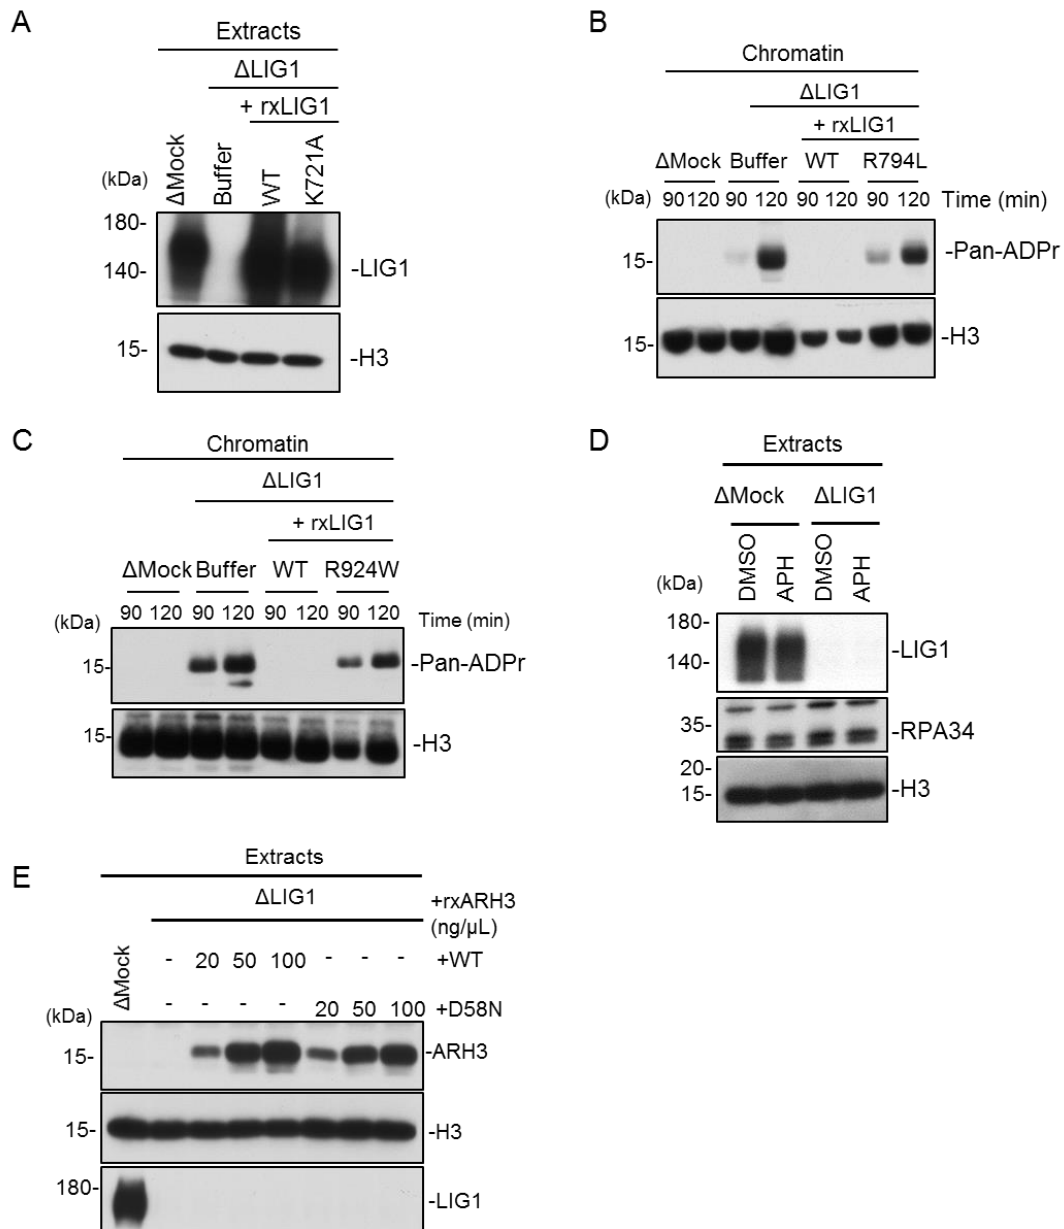

Supplementary Figure 3. (A) The extracts used in the chromatin binding experiment shown in Figure 3A were analyzed by immunoblot using the indicated antibodies. (B) xLIG1-depleted extracts were supplemented with either buffer or wild-type xLIG1-3xFlag or xLIG1-3xFlag-R794L. Chromatin-bound proteins were analyzed by immunoblotting using pan ADP-ribose detecting reagent (n = 2). (C) xLIG1-depleted extracts were supplemented with either buffer or wild-type xLIG1-3xFlag or xLIG1-3xFlag-R924W. Chromatin-bound proteins were analyzed by immunoblotting using pan ADP-ribose detecting reagent (n = 2). (D) The extracts used in the chromatin binding experiment shown in Figure 3D were analyzed by immunoblot using the indicated antibodies. (E) The extracts used in the chromatin binding experiment shown in Figure 3E were analyzed by immunoblot using the indicated antibodies.

**Figure S4**

**A**

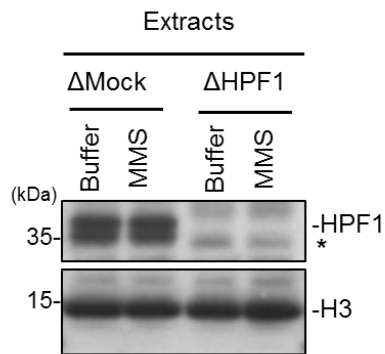

**B**

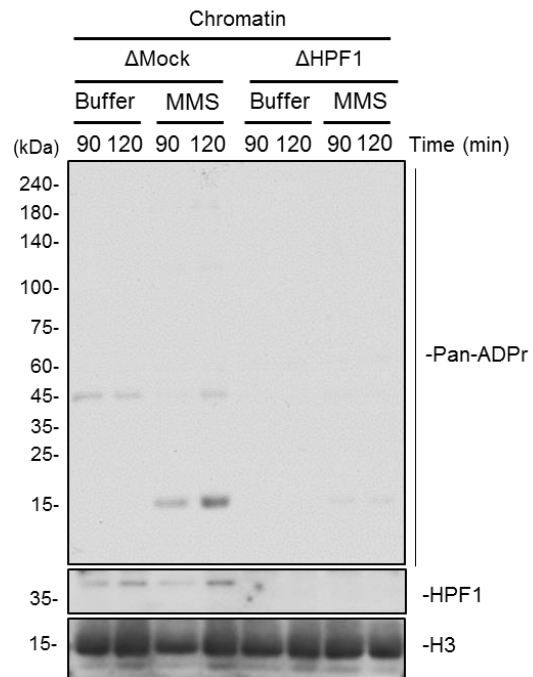

Supplementary Figure 4.

(A) Mock- and xHPF1-depleted extracts were analyzed by immunoblotting using the indicated antibodies. The asterisk indicates a non-specific band. (B) The extracts from (A) were used to replicate control or 1% MMS-treated sperm chromatin. Chromatin-bound proteins were analyzed by immunoblotting (n = 2).

**Figure S5**

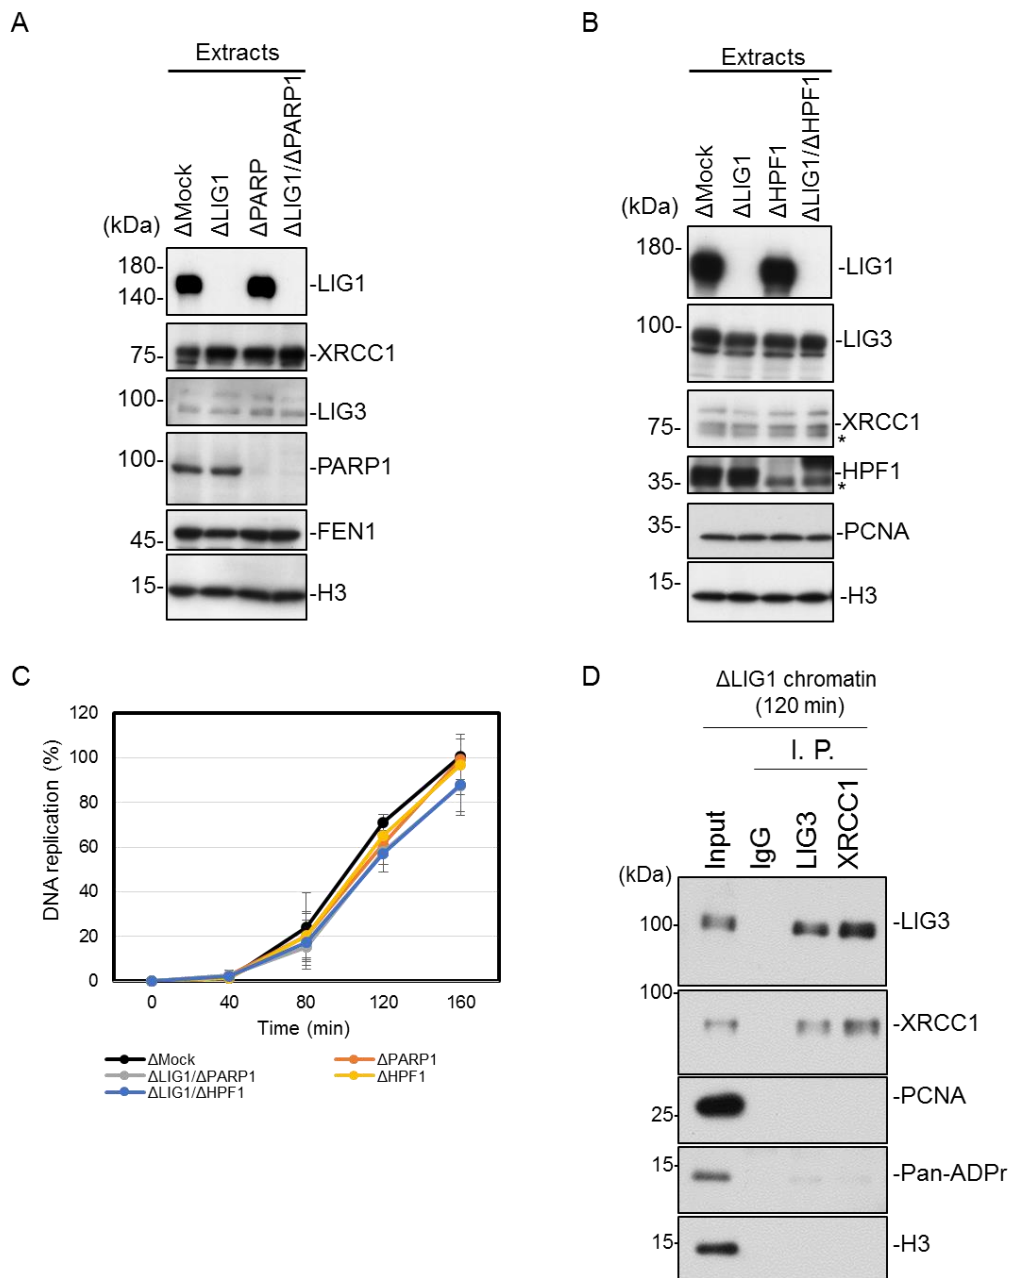

Supplementary Figure 5. (A) The extracts used in the chromatin binding experiment shown in Figure 5A were analyzed by immunoblot using the indicated antibodies. (B) The extracts used in the chromatin binding experiment shown in Figure 5B were analyzed by immunoblot using the indicated antibodies. The asterisk indicates a non-specific band. (C) DNA replication in xPARP1-, xHPF1-, xLIG1/xPARP1, xLIG1/xHPF1, and Mock-depleted extracts. The relative amounts of DNA synthesis are shown. Data shown are the average and S. D. (bars) three independent experiments. \*: Significantly different by Student's t-test at  $P < 0.01$ . (D) Chromatin fractions from the LIG1 immunodepleted extracts was solubilized with MNase followed by immunoprecipitation with anti-xLIG3 and xXRCC1 antibodies. The resultant immunoprecipitates were analyzed ( $n = 2$ ).

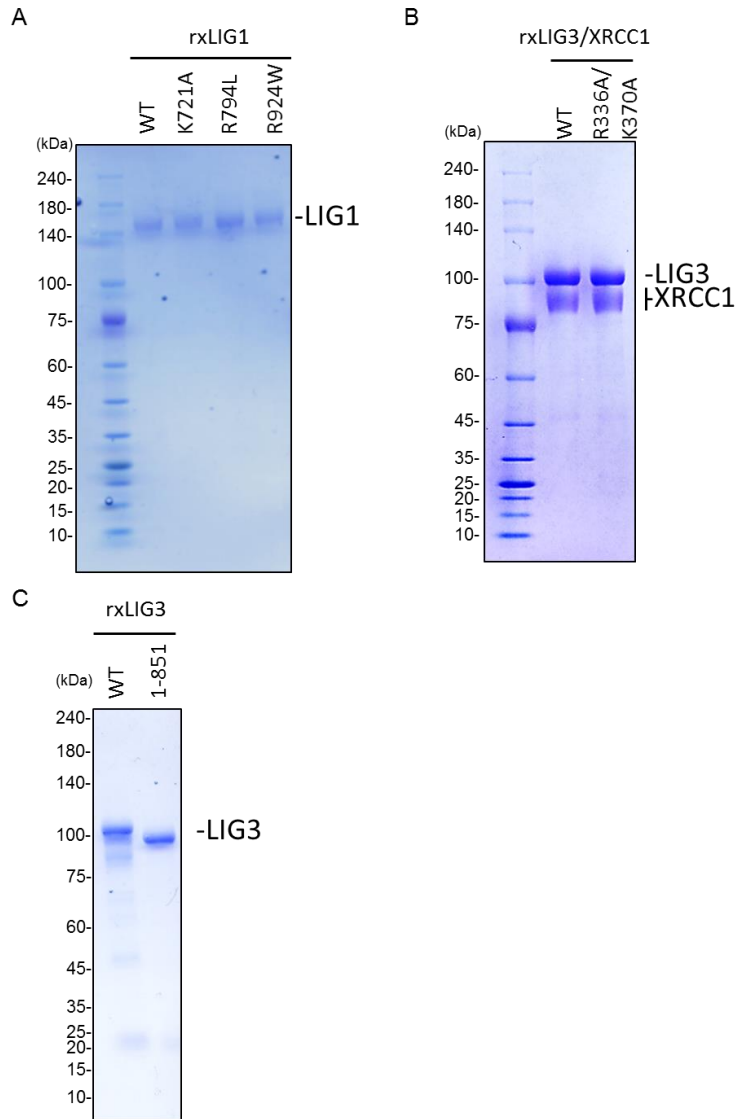

Supplementary Figure 6. (A) Wild-type LIG1, xLIG1-K721A, xLIG1-R794L, and xLIG1-R924W were expressed in Sf9 insect cells and purified using an C-terminal 3×Flag tag. The recombinant proteins were resolved by SDS - PAGE and visualized with Coomassie blue staining (n=3). (B) Wild-type 3×Flag-LIG3-xXRCC1-myc and 3×Flag-xLIG3-xXRCC1-R336AK370A-myc were co-expressed in Sf9 insect cells and purified using an N-terminal 3×Flag tag, and analyzed as in Supplementary Figure 6A (n=3). (C) Wild-type xLIG3 and xLIG3 (1-851) were expressed in Sf9 insect cells and purified using an N-terminal 3×Flag tag, and analyzed as in Supplementary Figure 6A (n=3).



**Table S1**

Supplementary Table 1

| No. | Sequence 5' -3'                          | Description                |
|-----|------------------------------------------|----------------------------|
| 1   | GAAACCTTCATTTTACGGCGGGGA                 | xLIG1 amplification        |
| 2   | ACTCCAAGGCAACACAATAGGTGG                 | xLIG1 amplification        |
| 3   | GGCGCGGATCAGATCTCATGCAACGAACAATAAAGTC    | pVL139-xLIG1-Flag3         |
| 4   | GGGCCCTCTAGAATTCTACTTGTTATCGTCATCCT      | pVL139-xLIG1-Flag3         |
| 5   | GCATATGACGGGGAGCGTGCACAGATAC             | xLig1K721A mutation        |
| 6   | GTATTCACAAGTAAAGGCAGCTTCA                | xLig1K721A mutation        |
| 7   | GCTGCTCAGCCCAAGCTAGGGGCTGAAGTAA          | xLig1F8AF9A mutation       |
| 8   | GGACTTTATTGTTCTGTTGCATGAGA               | xLig1F8AF9A mutation       |
| 9   | CTAAAGAGAAAGGATGTGGATGCATCAG             | xLig1R794L mutation        |
| 10  | AGTAGTCAGTACTTGAAATGGCTGA                | xLig1K794L mutation        |
| 11  | TGGACTGGTATCTATGGAGGCTTCTTAC             | xLig1R924W mutation        |
| 12  | TTTCCCTTTCCCAAGGTAAGCTCCA                | xLig1R924W mutation        |
| 13  | GAGTGGGCTTTCTCTGTGTTGTTG                 | xFEN1 amplification        |
| 14  | GACATATTGTCAAAGCCTTAGCGC                 | xFEN1 amplification        |
| 15  | TGTGTGAGTGAGGGAAATTGCAGG                 | xLIG3 amplification        |
| 16  | GTTGATCTGTGATGCCTTCTCCTG                 | xLIG3 amplification        |
| 17  | GGGCCCTCTAGAATTTTACACACAATTCTCATCAACAC   | pVL139-xLIG3-Flag3         |
| 18  | GGTGGTGTGAAGCAGAAATCTGCT                 | xXRCC1 amplification       |
| 19  | CTTTGCACTGGCAACATCCAGTTC                 | xXRCC1 amplification       |
| 20  | GGCGCGGATCAGATCTCATGCCTGTGATCAAACCTGAAGC | pVL139-xXRCC1-Flag3        |
| 21  | GGGCCCTCTAGAATTCGCCTTGGGCACCACAACGTAAGG  | pVL139-xXRCC1-Flag3        |
| 22  | GCAGCCGACCTCCGTGATAAAGCATTAG             | xXRCC1R336A mutation       |
| 23  | GAATGGATTCTGAAAGCCGCTCAGC                | xXRCC1R336A mutation       |
| 24  | GCATTCAGCCAGGTGAAAGCAGCGGGCG             | xXRCC1R370A mutation       |
| 25  | AGGGGTATTTGCAAAGGCACATATG                | xXRCC1R370A mutation       |
| 26  | CACGTTGTTACTGTAAGAGCCAGTGTGTTCCCTGT      | xPARP1 amplification       |
| 27  | CACTCCGTGATCCATCCTGCCAACGTATG            | xPARP1 amplification       |
| 28  | AGCGGAAACTCCACTCTTGTTGA                  | xPARG amplification        |
| 29  | GCTGGACATGAGTCAGGACTTCAT                 | xPARG amplification        |
| 30  | TTCTCAGAGAGTGCTGCTATTCGC                 | xHPF1 amplification        |
| 31  | AAGCCATCTTCCCTCTGAAGTGAC                 | xHPF1 amplification        |
| 32  | GCTGCGGAGCTTCCAGAGACAGATGGAAACC          | xHPF1Y251AR252<br>mutation |
| 33  | CCCAACATCATTCTTATCCACTGGC                | xHPF1Y251AR252<br>mutation |
| 34  | TTCTCAGAGAGTGCTGCTATTCGC                 | xARH3 amplification        |
| 35  | AAGCCATCTTCCCTCTGAAGTGAC                 | xARH3 amplification        |
| 36  | TGTATATGTTAAAACACTCTTTAGT                | xARH3D58N mutation         |
| 37  | AATGACACAGCCATGGCAAGGTCGATTG             | xARH3D58N mutation         |
